# Supplementary material for: Growth of GaAs nanowire–graphite nanoplatelet hybrid structures
Source: Royal Society of Chemistry journal article supplement (doi:10.1039/c9ce01027k), 2019-01-01
Supplement: c9ce01027k1.pdf [file c9ce01027k1.pdf]

### Electronic Supplementary Material

In Supplementary Material, we summarize the recent reports on experimental and numerical estimations of different surface energies. Table S1 gives the relevant notations and the values of surface energies, which we used in calculations.

Table S1. Notations and values of surface energies.

| Surface                                      | Notation         | Value, J/m <sup>2</sup> |
|----------------------------------------------|------------------|-------------------------|
| GNP - vapor                                  | $\gamma_{GV}$    | 0.05                    |
| NW sidewall - GNP                            | $\gamma_{nG}$    | 0.23                    |
| GNP – liquid gallium                         | $\gamma_{GGa}$   | 0.04                    |
| GNP – gold-gallium catalyst                  | $\gamma_{GAuGa}$ | 0.1                     |
| NW sidewall – liquid gallium                 | $\gamma_{nGa}$   | 0.12                    |
| NW sidewall – gold-gallium catalyst          | $\gamma_{nAuGa}$ | 0.15                    |
| NW sidewall – SiO <sub>x</sub> /Si           | $\gamma_{nO}$    | 0.6                     |
| SiO <sub>x</sub> /Si - liquid gallium        | $\gamma_{OGa}$   | 0.2                     |
| SiO <sub>x</sub> /Si - gold-gallium catalyst | $\gamma_{OAuGa}$ | 0.4                     |
| NW sidewall – NW sidewall (matched)          | $\gamma_{nNW}$   | 0.2                     |
| NW sidewall – NW sidewall (mismatched)       | $\gamma_{nNW}'$  | 1                       |

Different authors provided different values of graphite/graphene – vapor surface energy  $\gamma_{GV}$ : 0.047-0.055 J/m<sup>2</sup> in ref. [1], 0.029 J/m<sup>2</sup> in ref [2], 0.123-0.179 J/m<sup>2</sup> in ref. [3], 0.06 J/m<sup>2</sup> in ref. [4]. In our estimations, we used the intermediate value of  $\gamma_{GV}=0.05$  J/m<sup>2</sup>. In general, the graphite – vapor interface energy is extremely small in comparison with typical values of semiconductor-vapor interface energy  $\approx 1$  J/m<sup>2</sup> [5] or liquid – vapor interface energy, which is greater than 0.5 J/m<sup>2</sup> [2].

The nucleus-graphite surface energy was estimated to 0.23 J/m<sup>2</sup> [6] for the adsorption sites with the lowest energy.

The relevant GNP-liquid surface energies were estimated with the use of Young's equation:

$$\gamma_{GV} - \gamma_{GL} = \gamma_{LV} \cos\theta \quad (S1)$$

The index  $L = \text{''Ga''}$  and  $\text{''AuGa''}$  corresponds to pure Ga and Au-Ga droplets respectively.

Here  $\gamma_{LV}$  is the well-known liquid vapor energy equal to  $\gamma_{GaV} = 0.7 \text{ J/m}^2$  for pure gallium droplet and equal to  $\gamma_{AuGaV} = 1 \text{ J/m}^2$  for gold-gallium one, pure gold droplet has surface energy  $1.15 \text{ J/m}^2$  [4,7].  $\vartheta$  is the contact angle of the droplet on the flat GNP surface shown in Figure S1. We observed the contact angle of gallium droplets to be about  $90^\circ$  (Figure S1a) and, therefore, estimated the GNP-gallium interface energy to  $\gamma_{GGa} \approx 0.04 \text{ J/m}^2$ . Gold-gallium droplets demonstrate the contact angle about  $100^\circ$  (Figure S1b), from which we deduced  $\gamma_{GAuGa} \approx 0.1 \text{ J/m}^2$ . Droplet compositions were verified by EDX measurements.

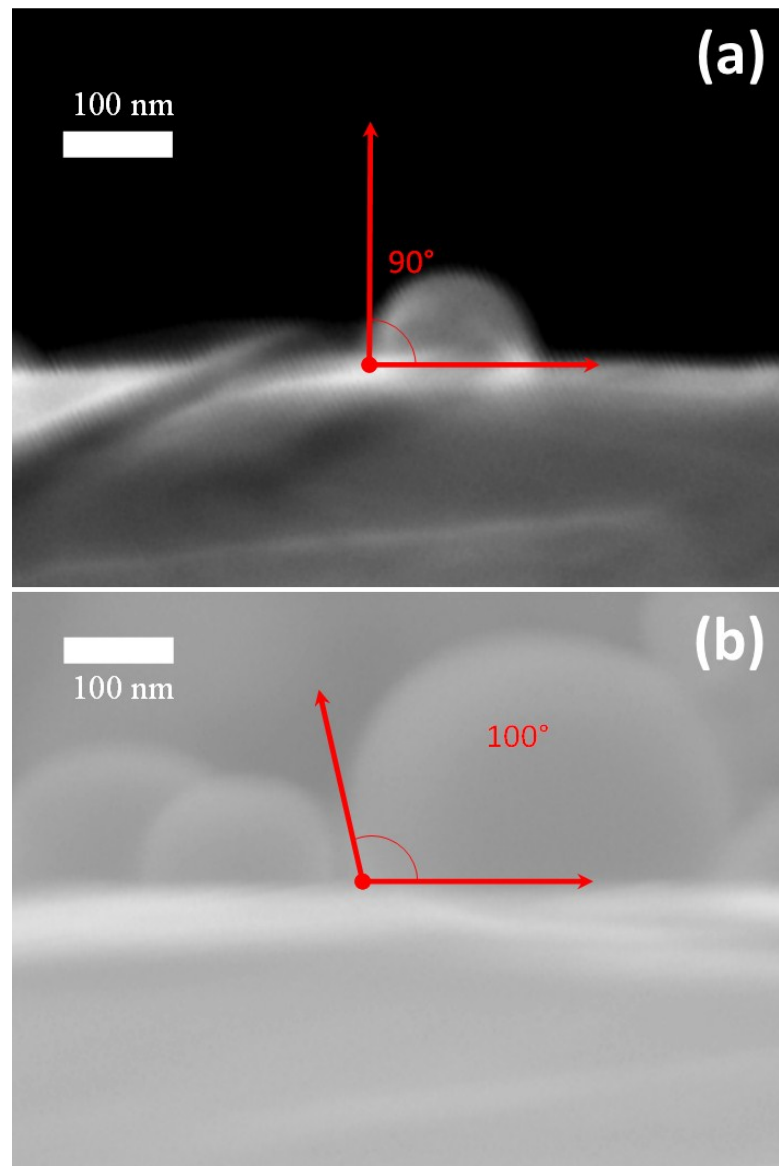

Figure S1. SEM images of catalyst droplets on GNP: (a) Ga droplet, (b) Au-Ga droplet.

The liquid-solid surface energies of NW sidewalls with GaAs(110) facet were estimated previously around  $\gamma_{nGa} = 0.12 \text{ J/m}^2$  and  $\gamma_{nAuGa} = 0.15 \text{ J/m}^2$  by Glas et al. in [8].

The energy of the interface between SiO<sub>2</sub>/Si substrate and NW sidewall was estimated as the energy of interface with Si assuming that the catalyst etches the oxide layer. So we used the value of surface energy  $\gamma_{nO}=0.6 \text{ J/m}^2$  [9].

Oxide-liquid surface energies were adopted from work:  $\gamma_{OGa}=0.2 \text{ J/m}^2$  [10] and  $\gamma_{OAuGa}=0.4 \text{ J/m}^2$  [11].

The energy of the interface between two NWs could be estimated as interfacial energy of grain boundary, which depends on the orientation angle [12]. Hence we considered two types of interfaces: the matched NW interface with the energy of the faulty stacked sidewalls  $0.2 \text{ J/m}^2$  [13], and the mismatched NW interface with the energy corresponding to GaAs-vacuum surface, which has energy about  $1 \text{ J/m}^2$  [13].

#### References:

- [1] S. Wang, Y. Zhang, N. Abidi, L. Cabrales, *Langmuir* **2009**, *25*, 11078.
- [2] X. Yuan, J. Yang, J. He, H. H. Tan, C. Jagadish, *J. Phys. D. Appl. Phys.* **2018**, *51*, 283002.
- [3] Z. Zong, C. L. Chen, M. R. Dokmeci, K. T. Wan, *J. Appl. Phys.* **2010**, *107*.
- [4] J. Wallentin, D. Kriegner, J. Stangl, M. T. Borgström, *Nano Lett.* **2014**, *14*, 1707.
- [5] N. V. Sibirev, M. A. Timofeeva, A. D. Bol'shakov, M. V. Nazarenko, V. G. Dubrovskii, *Phys. Solid State* **2010**, *52*.
- [6] A. Marthinsen, A first-principles Study of epitaxial Interfaces between Graphene and GaAs, **2014**.
- [7] S. Sakong, Y. A. Du, P. Kratzer, *Phys. Rev. B - Condens. Matter Mater. Phys.* **2013**, *88*, 1.
- [8] F. Glas, M. R. Ramdani, G. Patriarche, J.-C. Harmand, *Phys. Rev. B* **2013**, *88*, 195304.
- [9] A. Zdyb, J. M. Olchowik, D. Szymczuk, J. Mucha, K. Zabielski, M. Mucha, W. Sadowski, *Cryst. Res. Technol.* **2002**, *37*, 875.
- [10] F. Matteini, G. Tütüncüoğlu, D. Mikulik, J. Vukajlovic-Plestina, H. Potts, J. B. Leran, W. C. Carter, A. F. Morral, *Cryst. Growth Des.* **2016**, *16*, 5781.
- [11] S. Breuer, M. Hilse, A. Trampert, L. Geelhaar, H. Riechert, *Phys. Rev. B* **2010**, *82*, 075406.
- [12] W. Shockley, W. T. Read, *Phys. Rev.* **1949**, *75*, 692.
- [13] P. Caroff, K. A. Dick, J. Johansson, M. E. Messing, K. Deppert, L. Samuelson, *Nat. Nanotechnol.* **2009**, *4*, 50.
